# Supplementary material for: Overview of the Germline and Expressed Repertoires of the TRB Genes in Sus scrofa
Source: PubMed Central journal article supplement (PMC6230588; doi:10.3389/fimmu.2018.02526), 2018-11-05

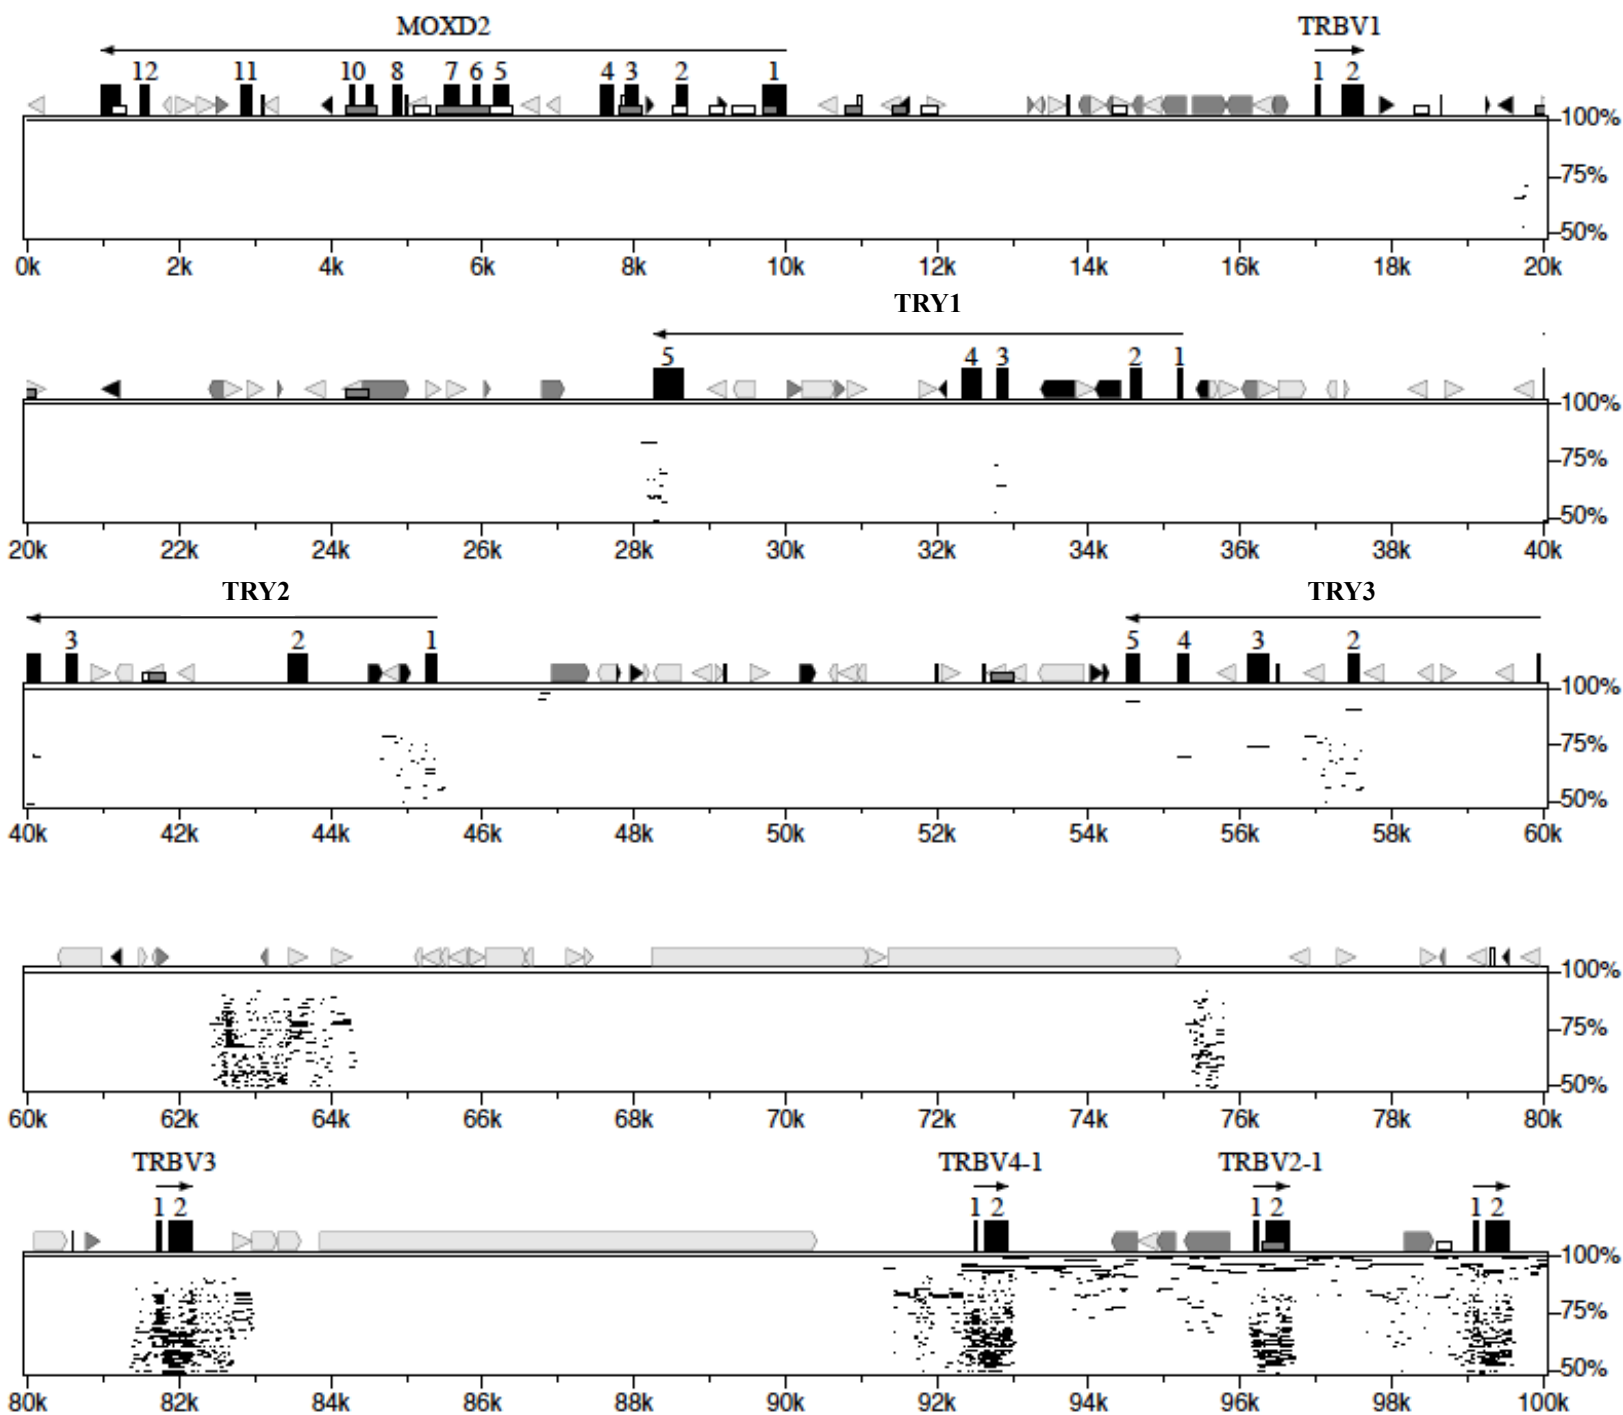

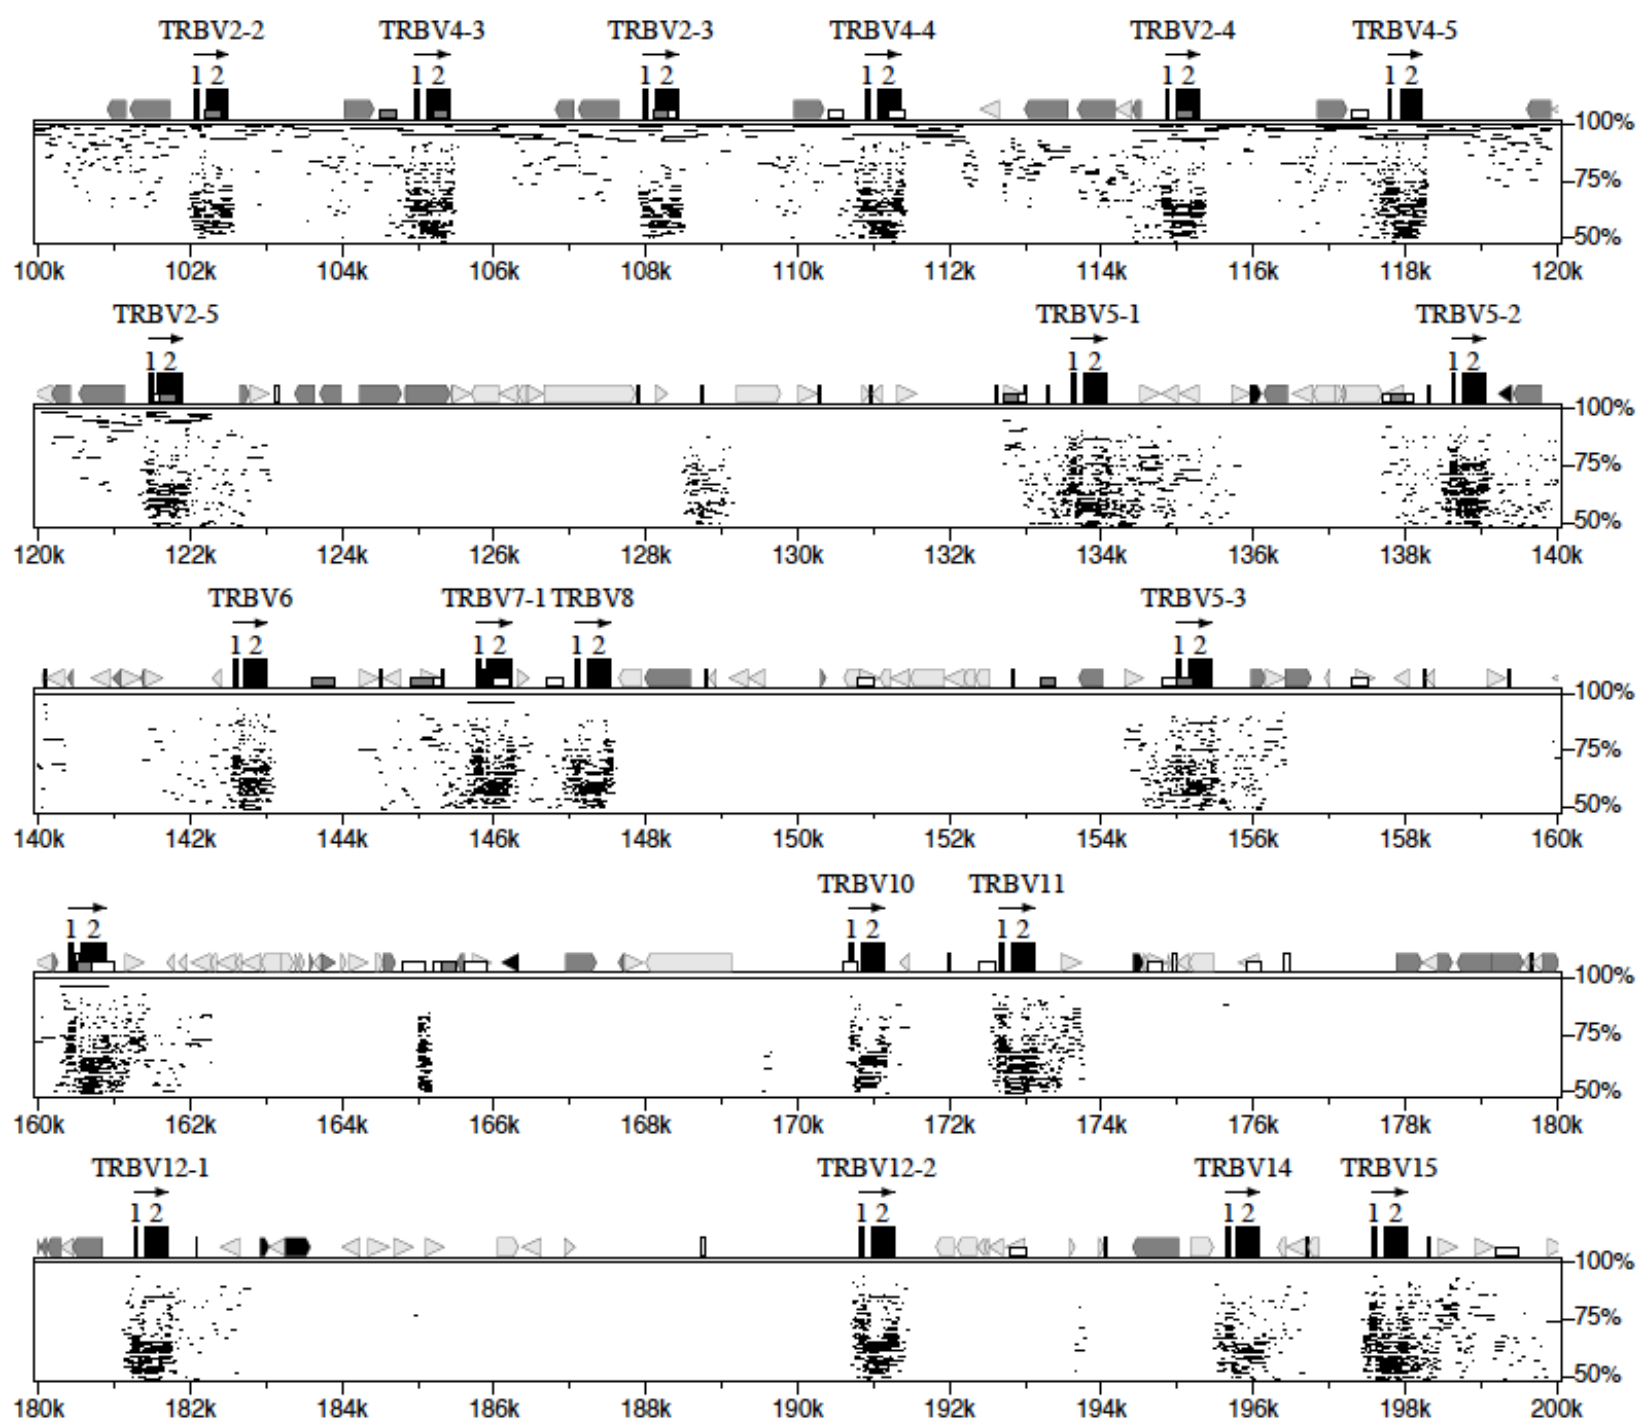

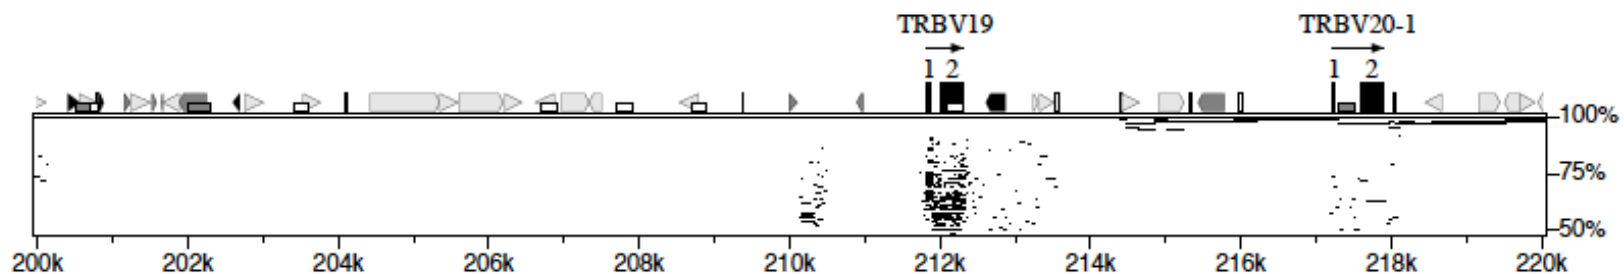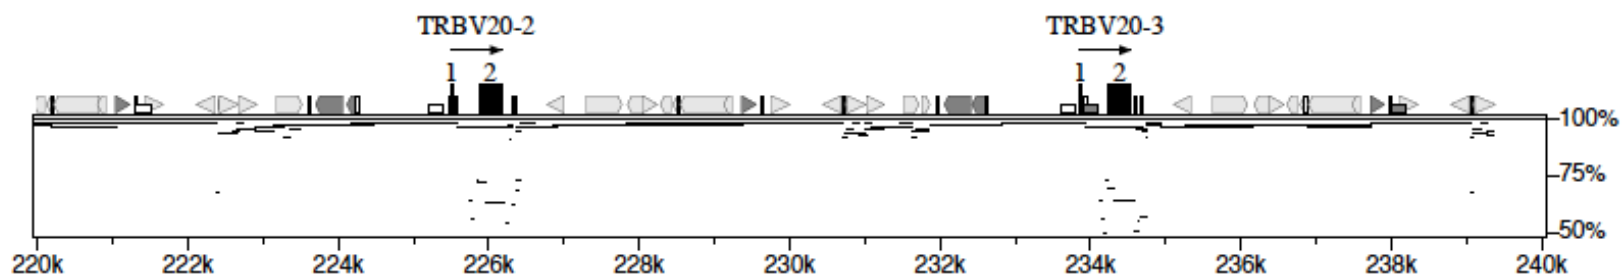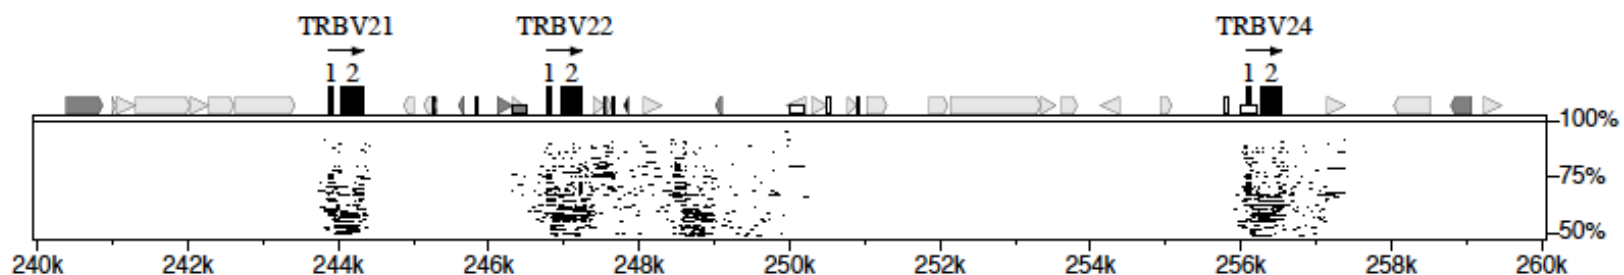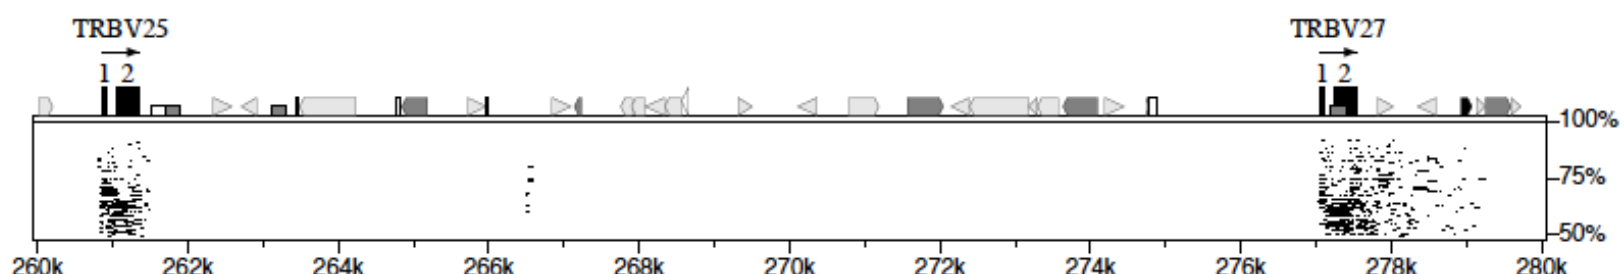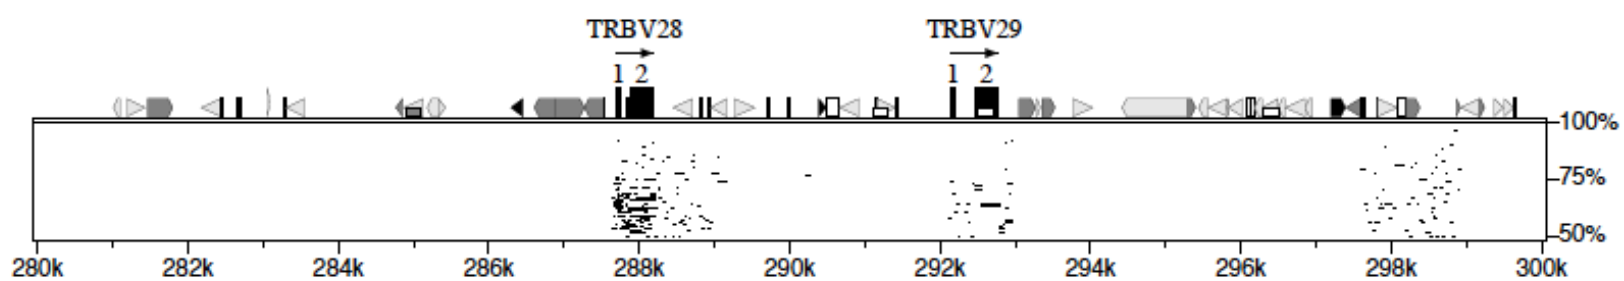

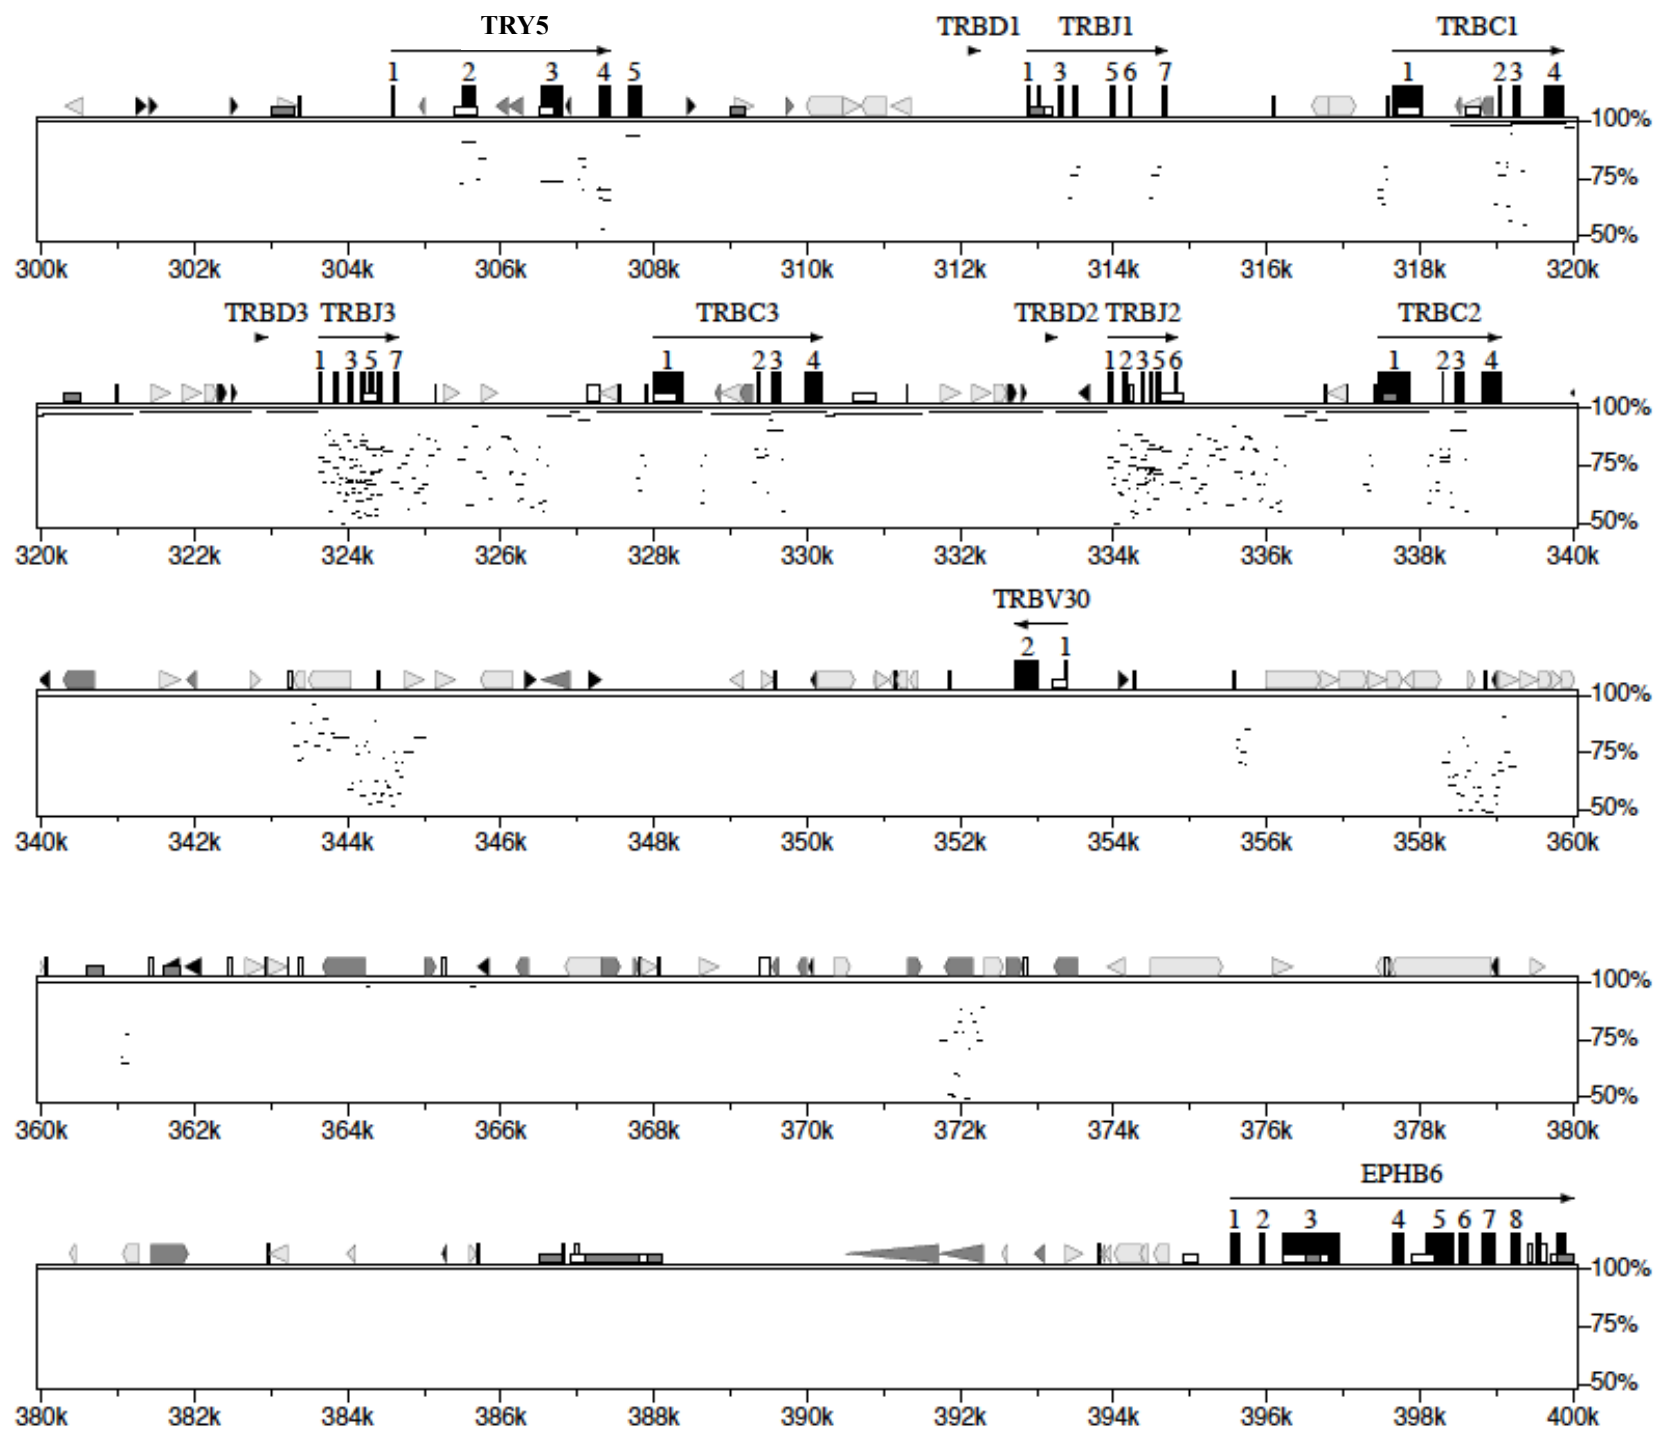

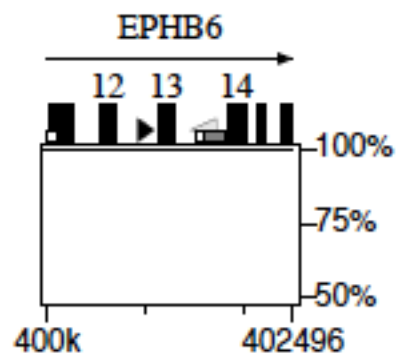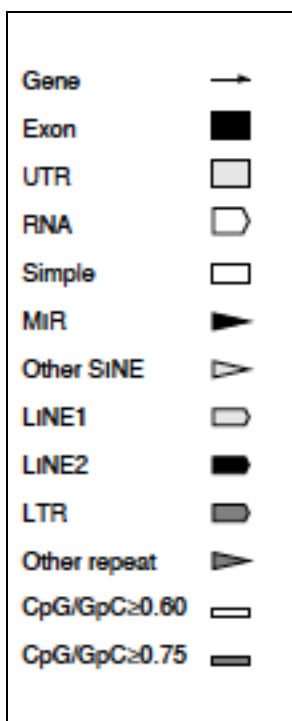

Supplement: Image_1.pdf [file Image_1.pdf]
