# Supplementary material for: Overview of the Germline and Expressed Repertoires of the TRB Genes in Sus scrofa
Source: PubMed Central journal article supplement (PMC6230588; doi:10.3389/fimmu.2018.02526), 2018-11-05
Supplement: Table_2.pdf [file Table_2.pdf]

**Supplementary Table S2.** Description of the unrelated TRB genes in the *Sus scrofa* chromosome 18 genome assembly (NCBI Reference Sequence NC\_010460). The position of all genes and their classification and functionality are reported.

| <b>Gene classification</b> | <b>Functionality</b> | <b>Position (complement)</b> |
|----------------------------|----------------------|------------------------------|
| MOXD2                      | F                    | 7750229-7741199              |
| TRY1                       | F                    | 7722936-7715969              |
| TRY2                       | F                    | 7711199-7705814              |
| TRY3                       | F                    | 7696007-7691245              |
| TRY5                       | F                    | 7446624-7443380              |
| EPBH6                      | F                    | 7355665-7348703              |
